# Supplementary material for: Towards Biocontained Cell Factories: An Evolutionarily Adapted Escherichia coli Strain Produces a New-to-nature Bioactive Lantibiotic Containing Thienopyrrole-Alanine
Source: PubMed Central journal article supplement (PMC5025777; doi:10.1038/srep33447), 2016-09-16
Supplement: srep33447-s1.pdf [file srep33447-s1.pdf]

Supplementary Information for

**Towards biocontained cell factories: An Evolutionary Adapted  
*Escherichia coli* Strain Produces a New-to-nature Bioactive  
Lantibiotic Containing Thienopyrrole-Alanine**

**Anja Kuthning<sup>1</sup>, Patrick Durkin<sup>2</sup>, Stefan Oehm<sup>2</sup>, Michael G. Hoesl<sup>2</sup>, Nediljko Budisa<sup>2,\*</sup>,  
and Roderich D. Süssmuth<sup>1,\*</sup>**

<sup>1</sup> Technische Universität Berlin, Institut für Chemie, Biologische Chemie, Straße des 17. Juni 124, Berlin, 10623, Germany

<sup>2</sup> Technische Universität Berlin, Institut für Chemie, Biokatalyse, Müller-Breslau-Straße 10, Berlin, 10623, Germany

\* [suessmuth@chem.tu-berlin.de](mailto:suessmuth@chem.tu-berlin.de) and [budisa@biocat.tu-berlin.de](mailto:budisa@biocat.tu-berlin.de)

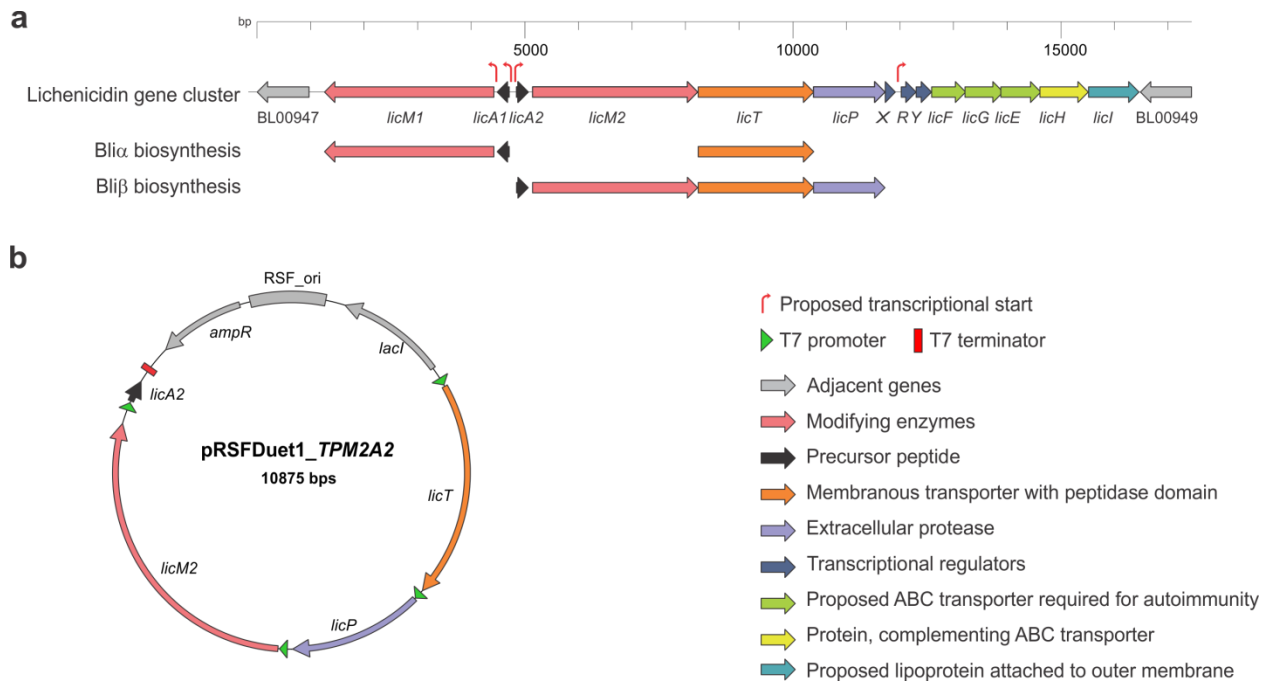

**Supplementary figure S1: Genetic background for lichenicidin expression.** (a) Gene cluster coding for the biosynthesis of lichenicidin as isolated from *Bacillus licheniformis*. Genes required for expression of the single peptides Bli $\alpha$  and Bli $\beta$  in *E. coli*. (b) Genetic setup for high-level production of Bli $\beta$  in *E. coli* as published earlier.

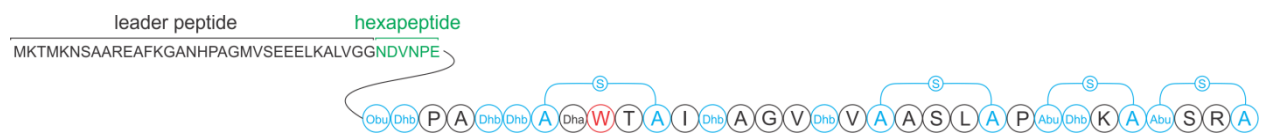

**Supplementary figure S2: Amino acid sequence of the full length precursor peptide of Bliβ.**

**Supplementary table S1: Theoretical and measured nominal masses of Bli $\beta$  and Bli $\beta$ ([3,2]Tpa<sup>9</sup>) detected with high-resolving ESI-Orbitrap-MS.**

| <b>Compound</b>      | <b>Theoretical<br/>mass</b> | <b>nominal</b> | <b>Measured nominal mass</b> | <b>Mass error (ppm)</b> |
|----------------------|-----------------------------|----------------|------------------------------|-------------------------|
| Bli $\beta$          |                             | 3019.3601      | 3019.3617                    | 0.5                     |
| Bli $\beta$ [3,2]Tpa |                             | 3025.3166      | 3025.3227                    | 2.03                    |

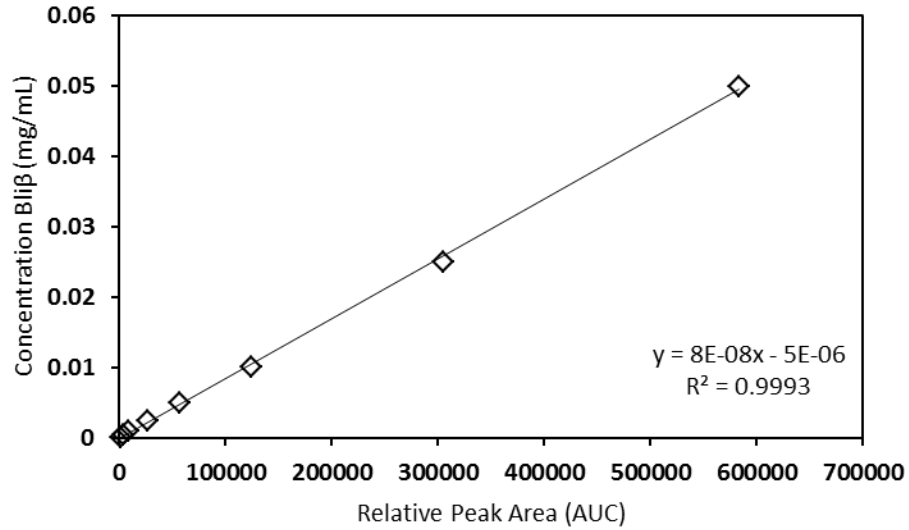

**Supplementary figure S4: Bliβ standard curve.** Liquid stocks of purified Bliβ peptide were prepared in 70% ACN. Concentrations applied for MS measurements were in the range 0.0001 mg mL<sup>-1</sup> to 0.5 mg mL<sup>-1</sup>. The concentration was plotted against the resulting peak area in MRM measurements as stated in the methods section. Line of best fit and coefficient of determination R<sup>2</sup> were calculated as indicated.
